# Supplementary material
Source: publisher site journal article supplement (https://www.dovepress.com/article/248685)
Supplement: Supplementary file 1 [file get_supplementary_file.php]

**Supplemental Table 1. List of Identified ADHD Scales**

| **Name** | **Reporter** | **Concept(s)** | **Include/exclude** | **Full scale access available?** |
| --- | --- | --- | --- | --- |
| ADHD CSS (Barkley) | Parent or self-report | Current symptom severity | Include | Yes |
| ADHD Family Scale | Family members of child with ADHD (parent, sibling, etc.) | Family issues specific to ADHD (compared with general family stress) | Include | No |
| ADHD-FX | Parent or teacher | Functional impairment | Include | Yes |
| ADHD-RS-IV/ADHD-RS-5 | Parent or teacher | Frequency and severity of ADHD symptoms | Include | Yes |
| AIM-C | Parent | Impact of ADHD | Include | Yes |
| ASRS-Adolescent | Self-report | ADHD symptom severity | Include | Yes |
| Brown ADD Scales | Clinician | Executive function impairment | Include | No |
| CASI-Progress Monitor | Parent or teacher | Symptom changes and treatment effects | Include | No |
| CGI-ADHD-S | Clinician |  | Include | No |
| CHAOS | Parents | Behavior checklist | Include | No |
| Conners 3 | Parent, teacher, self-report | ADHD related behavior | Include | No |
| Conners-Wells Adolescent Self Report Scale | Self-report | Problematic behavior | Include | No |
| DPREMB | Parent | Effect of ADHD on behavior before school and at night | Include | No |
| DAYAS | Parent or teacher | ADHD and ODD symptoms and medication-related symptoms | Include | Yes |
| Family Strain Index | Parent | Impact of ADHD on family life | Include | No |
| FTF | Parent | Symptoms and problems typical of ADHD | Include | No |
| Hyperactivity Scale of af Klinteberg | Teacher | ADHD symptoms | Include | No |
| IRS | Parent or teacher | School and non-school impairment due to ADHD symptoms | Include | Yes |
| Parental Account of Children's Symptoms | Parent | Symptoms of hyperactivity | Include | No |
| PERCI | Parent | Parent's emotional response to ADHD | Include | No |
| SKAMP | Teacher | Functional impairment related to ADHD | Include | Yes |
| SNAP-IV | Parent or teacher | ADHD diagnosis | Include | Yes |
| SWAN | Parent, teacher, clinician, self-report | ADHD-typical behaviors | Include | Yes |
| Time-Sensitive ADHD Symptom Scale | Self-report | Changes in ADHD symptoms over the course of a day | Include | No |
| Vanderbilt ADHD Diagnostic Rating Scales | Parent or teacher | ADHD symptom severity | Include | Yes |
| WFIRS | Parent or self-report | Functional impairment related to ADHD | Include | Yes |

Abbreviations: ADD, attention deficit disorder; ADHD, attention-deficit/hyperactivity disorder; ADHD CSS, ADHD Current Symptoms Scale; ADHD-FX, ADHD Functional Impairment Questionnaire; ADHD-RS-IV, ADHD Rating Scale–DSM-IV; ADHD-RS-5, ADHD Rating Scale–DSM-5; AIM-C, ADHD Impact Module: Child; ASRS, Adult ADHD Self-Report Scale–Adolescent Edition; CASI, Child & Adolescent Symptom Inventory; CGI-ADHD S, Clinical Global Impressions-ADHD-Severity; CHAOS, Conduct/Hyperactive/Attention-Problem Scale; DPREMB, Daily Parent Rating of Evening and Morning Behavior; DAYAS, Day Profile of ADHD Symptoms; FSI, Family Strain Index; FTF, Five to Fifteen; IRS, Impairment Rating Scale; PERCI, Parental Emotional Response to Children Index; SKAMP, Swanson, Kotkin, Agler, M-Flynn, and Pelham Scale; SNAP-IV, Swanson, Nolan, and Pelham Rating Scale–DSM-IV; SWAN, Strengths and Weaknesses of ADHD Symptoms and Normal Behavior; WFIRS, Weiss Functional Impairment Rating Scale
